# Supplementary material
Source: HighWire-hosted journal article supplement (https://jnis.bmj.com/content/13/2/124)
Supplement: inline-supplementary-material-1 [file inline-supplementary-material-1.pdf]

## Supplemental Material

Supplemental Table I. Overall demographics, clinical and procedure characteristics

|                                              | All Patients<br>(n=436) | FPR<br>(n=254)    | non-FPR<br>(n=182) | p value          |
|----------------------------------------------|-------------------------|-------------------|--------------------|------------------|
| <b>Demographics&amp; risk factors n (%)</b>  |                         |                   |                    |                  |
| Age (years) [IQR]                            | 66 [54-77]              | 65 [54-77]        | 66.5 [54-77]       | 0.88             |
| Female                                       | 229 (52.5)              | 138 (54.3)        | 91 (50)            | 0.37             |
| Current smokers                              | 67 (15.4)               | 24 (13.2)         | 43 (16.9)          | 0.29             |
| Hypertension                                 | 327 (75)                | 194 (76.4)        | 133 (73.1)         | 0.43             |
| Diabetes mellitus                            | 116 (26.6)              | 68 (26.8)         | 48 (26.4)          | 0.93             |
| Hyperlipidemia                               | 145 (33.3)              | 81 (31.9)         | 64 (35.2)          | 0.47             |
| Atrial fibrillation                          | 158 (36.2)              | 85 (33.5)         | 73 (40.1)          | 0.16             |
| <b>Clinical and procedure findings n (%)</b> |                         |                   |                    |                  |
| LKW-Puncture (min) [IQR]                     | 319.5 [220-533]         | 333 [236.8-574.5] | 296 [202.5-529]    | 0.10             |
| Baseline NIHSS score [IQR]                   | 17.3±5.8                | 17±6              | 17.9±5.5           | 0.12             |
| Pre-procedure IV-tPA                         | 165 (37.8)              | 92 (36.2)         | 73 (40.1)          | 0.41             |
| ASPECTS [IQR]                                | 8 [7-9]                 | 8 [7-10]          | 8 [7-9]            | 0.14             |
| Site of occlusion:                           |                         |                   |                    |                  |
| Internal carotid artery                      | 108 (24.8)              | 62 (24.4)         | 46 (25.3)          |                  |
| Middle cerebral artery-M1 segment            | 328 (75.2)              | 192 (75.6)        | 136 (74.7)         | 0.84             |
| First order technique:                       |                         |                   |                    |                  |
| SR                                           | 294 (67.4)              | 176 (69.3)        | 118 (64.8)         |                  |
| CA                                           | 52 (11.9)               | 30 (11.8)         | 22 (12.1)          |                  |
| Combined SR & CA                             | 90 (20.6)               | 48 (18.9)         | 42 (23.1)          | 0.54             |
| General anesthesia                           | 47 (10.8)               | 26 (10.2)         | 21 (11.5)          | 0.67             |
| Balloon guide catheter                       | 376 (86.2)              | 223 (87.8)        | 153 (84.1)         | 0.27             |
| Procedure duration (min) [IQR]               | 44.5 [30-67.8]          | 34 [26-48]        | 64.5 [45.8-89.3]   | <b>&lt;0.001</b> |
| LKW-Reperfusion(mTICI2c-3)(min) [IQR]        | 383.5 [270-618.5]       | 381.5 [269.5-617] | 387.5 [270.8-627]  | 0.93             |
| <b>Outcome n (%)</b>                         |                         |                   |                    |                  |
| sICH                                         | 21 (4.8)                | 13 (5.1)          | 8 (4.4)            | 0.73             |
| 90-day mortality                             | 74 (17)                 | 36 (14.2)         | 38 (20.9)          | 0.07             |
| 90-day mRS (0-2)                             | 224 (51.4)              | 144 (56.7)        | 80 (44)            | <b>0.009</b>     |

Abbreviations: IQR; interquartile range, LKW; Last Known Well, ASPECTS; Alberta Stroke Program Early CT Score, NIHSS; National Institute of Health Stroke Scale, IV-tPA; intravenous tissue plasminogen activator, SR; Stent-Retriever, CA; Contact Aspiration, sICH; symptomatic intracranial hemorrhage, mRS; modified Rankin Scale

**Supplemental Table II. Multivariable regression analyses for good outcome (90-day mRS 0-2)**

|                                  | Odds ratio | 95% CI         | p value          |
|----------------------------------|------------|----------------|------------------|
| <b>All Patients</b>              |            |                |                  |
| Age                              | 0.961      | 0.946 - 0.976  | <b>&lt;0.001</b> |
| Baseline NIHSS score             | 0.931      | 0.895 - 0.969  | <b>&lt;0.001</b> |
| ASPECTS                          | 1.253      | 1.093 - 1.437  | <b>0.001</b>     |
| Diabetes mellitus                | 0.467      | 0.283 - 0.771  | <b>0.003</b>     |
| Current smoker                   | 2.413      | 1.278 - 4.556  | <b>0.007</b>     |
| First pass reperfusion           | 1.703      | 1.103 - 2.629  | <b>0.016</b>     |
| Pre-procedure IV-tPA             | 1.668      | 1.029 - 2.705  | <b>0.038</b>     |
| General anesthesia               | 0.485      | 0.233 - 1.010  | 0.05             |
| LKW-Reperfusion                  | 1.00       | 0.999 - 1.00   | 0.31             |
| Hypertension                     | 0.746      | 0.447 - 1.245  | 0.26             |
| <b>Group with ASPECTS &gt; 7</b> |            |                |                  |
| Age                              | 0.963      | 0.944 - 0.982  | <b>&lt;0.001</b> |
| Pre-procedure IV-tPA             | 2.048      | 1.121 - 3.742  | <b>0.02</b>      |
| Diabetes mellitus                | 0.402      | 0.219 - 0.737  | <b>0.003</b>     |
| Current smokers                  | 2.211      | 1.004 - 4.871  | <b>0.049</b>     |
| General anesthesia               | 0.414      | 0.161 - 1.061  | 0.07             |
| Baseline NIHSS score             | 0.959      | 0.913 - 1.008  | 0.10             |
| Hypertension                     | 0.726      | 0.382 - 1.380  | 0.33             |
| First pass reperfusion           | 1.372      | 0.798 - 2.358  | 0.25             |
| LKW-Reperfusion                  | 1.00       | 0.999 - 1.001  | 0.53             |
| <b>Group with ASPECTS ≤ 7</b>    |            |                |                  |
| Baseline NIHSS score             | 0.860      | 0.798 - 0.927  | <b>&lt;0.001</b> |
| First pass reperfusion           | 3.748      | 1.590 - 8.838  | <b>0.003</b>     |
| Age                              | 0.954      | 0.927 - 0.982  | <b>0.001</b>     |
| Current smoker                   | 5.355      | 1.653 - 17.342 | <b>0.005</b>     |
| LKW-Reperfusion                  | 0.999      | 0.998 - 1.00   | 0.22             |
| Atrial fibrillation              | 0.784      | 0.301 - 2.041  | 0.62             |
| Diabetes mellitus                | 0.574      | 0.215 - 1.536  | 0.27             |
| Hypertension                     | 0.948      | 0.375 - 2.394  | 0.91             |
| <b>Group with HIR ≥ 0.3</b>      |            |                |                  |
| Age                              | 0.945      | 0.921 - 0.970  | <b>&lt;0.001</b> |
| First pass reperfusion           | 2.204      | 1.148 - 4.233  | <b>0.01</b>      |
| rCBF<30%                         | 0.984      | 0.971 - 0.999  | <b>0.03</b>      |
| Current smoker                   | 2.358      | 0.996 - 5.584  | 0.05             |
| LKW-Reperfusion                  | 0.999      | 0.998 - 1.00   | 0.07             |
| General anesthesia               | 0.337      | 0.101 - 1.123  | 0.08             |
| Baseline NIHSS score             | 0.954      | 0.900 - 1.010  | 0.11             |
| Diabetes mellitus                | 0.541      | 0.259 - 1.134  | 0.10             |
| Aspects                          | 1.170      | 0.959 - 1.427  | 0.12             |
| Hypertension                     | 0.846      | 0.402 - 1.781  | 0.66             |
| Pre-procedure IV-tPA             | 1.707      | 0.826 - 3.526  | 0.15             |
| <b>Group with HIR &lt; 0.3</b>   |            |                |                  |
| Age                              | 0.966      | 0.937 - 0.995  | <b>0.02</b>      |
| General anesthesia               | 0.110      | 0.012 - 1.019  | 0.05             |
| Site of occlusion (ICA)          | 0.431      | 0.147 - 1.271  | 0.13             |
| Baseline NIHSS score             | 0.956      | 0.882 - 1.037  | 0.28             |
| First pass reperfusion           | 1.524      | 0.592 - 3.920  | 0.38             |
| LKW-Reperfusion                  | 0.999      | 0.998 - 1.00   | 0.20             |

**Supplemental Table III. Demographics, clinical and procedure characteristics (matched groups with ASPECTS >7)**

|                                                                                   | All Patients<br>(n=196)            | FPR<br>(n=98)                     | non-FPR<br>(n=98)                   | p value          |
|-----------------------------------------------------------------------------------|------------------------------------|-----------------------------------|-------------------------------------|------------------|
| <b>Demographics&amp; risk factors n (%)</b>                                       |                                    |                                   |                                     |                  |
| Age (years) mean ± SD                                                             | 66.2± 15.5                         | 65.5 ± 16.4                       | 66.9 ± 14.6                         | 0.55             |
| Female                                                                            | 108 (55.1)                         | 57 (58.2)                         | 51 (52)                             | 0.40             |
| Current smokers                                                                   | 28 (14.3)                          | 15 (53.6)                         | 13 (46.4)                           | 0.68             |
| Hypertension                                                                      | 142 (72.4)                         | 69 (70.4)                         | 73 (74.5)                           | 0.52             |
| Diabetes mellitus                                                                 | 56 (28.6)                          | 26 (26.5)                         | 30 (30.6)                           | 0.53             |
| Hyperlipidemia                                                                    | 62 (31.6)                          | 24 (24.5)                         | 38 (38.8)                           | <b>0.03</b>      |
| Atrial fibrillation                                                               | 81 (41.3)                          | 37 (37.8)                         | 44 (44.9)                           | 0.31             |
| <b>Clinical and procedure findings n (%)</b>                                      |                                    |                                   |                                     |                  |
| LKW-Puncture (min) [IQR]                                                          | 297 [204.5-503.3]                  | 325 [241-507.5]                   | 283 [200-498]                       | 0.10             |
| Baseline NIHSS score mean ± SD                                                    | 17.2 ± 5.5                         | 16.9 ± 5.4                        | 17.5 ± 5.7                          | 0.40             |
| Pre-procedure IV-tPA                                                              | 88 (44.9)                          | 47 (48)                           | 41 (41.8)                           | 0.39             |
| ASPECTS [IQR]                                                                     | 9 [8-10]                           | 9 [8-10]                          | 9 [8-10]                            | 0.15             |
| Site of occlusion:<br>Internal carotid artery<br>Middle cerebral artery-M1segment | 49 (25)<br>147 (75)                | 25 (25.5)<br>73 (74.5)            | 24 (24.5)<br>74 (75.5)              | 0.87             |
| First-line technique:<br>SR<br>CA<br>Combined SR & CA                             | 147 (75)<br>23 (11.7)<br>26 (13.3) | 78 (79.6)<br>12 (12.2)<br>8 (8.2) | 69 (70.4)<br>11 (11.2)<br>18 (18.4) | 0.11             |
| General anesthesia                                                                | 18 (9.2)                           | 8 (8.2)                           | 10 (10.2)                           | 0.62             |
| Balloon guide catheter                                                            | 168 (85.7)                         | 87 (88.8)                         | 81 (82.7)                           | 0.22             |
| Procedure duration (min) [IQR]                                                    | 49.5 [32-70]                       | 35 [26.8-52]                      | 63 [46.8-90.5]                      | <b>&lt;0.001</b> |
| LKW-Reperfusion (mTICI2c-3)(min)<br>[IQR]                                         | 365.5 [270-560.5]                  | 371.5 [276-556.8]                 | 357 [263.5-624]                     | 0.79             |
| <b>Outcome n (%)</b>                                                              |                                    |                                   |                                     |                  |
| sICH                                                                              | 7 (3.6)                            | 2 (2)                             | 5 (5.1)                             | 0.45             |
| 90-day mortality                                                                  | 35 (17.9)                          | 13 (13.3)                         | 22 (22.4)                           | 0.09             |
| 90-day mRS 0-2                                                                    | 112 (57.1)                         | 61 (62.2)                         | 51 (52)                             | 0.15             |

Abbreviations: IQR; interquartile range, LKW; Last Known Well, ASPECTS; Alberta Stroke Program Early CT Score, NIHSS; National Institute of Health Stroke Scale, IV-tPA; intravenous tissue plasminogen activator, SR; Stent-Retriever, CA; Contact Aspiration, sICH; symptomatic intracranial hemorrhage, mRS; modified Rankin Scale

**Supplemental Table IV. Demographics, clinical and procedure characteristics (matched groups with ASPECTS  $\leq 7$ )**

|                                              | All Patients<br>(n=118) | FPR<br>(n=59)  | non-FPR<br>(n=59) | p value          |
|----------------------------------------------|-------------------------|----------------|-------------------|------------------|
| <b>Demographics&amp; risk factors n (%)</b>  |                         |                |                   |                  |
| Age (years) mean $\pm$ SD                    | 64.4 $\pm$ 16           | 65 $\pm$ 16    | 63.7 $\pm$ 16     | 0.64             |
| Female                                       | 60 (50.8)               | 34 (57.6)      | 26 (44.1)         | 0.14             |
| Current smokers                              | 13 (11)                 | 5 (8.5)        | 8 (13.6)          | 0.38             |
| Hypertension                                 | 89 (75.4)               | 44 (74.6)      | 45 (76.3)         | 0.83             |
| Diabetes mellitus                            | 30 (25.4)               | 16 (27.1)      | 14 (23.7)         | 0.67             |
| Hyperlipidemia                               | 40 (33.9)               | 22 (37.3)      | 18 (30.5)         | 0.44             |
| Atrial fibrillation                          | 35 (29.7)               | 15 (25.4)      | 20 (33.9)         | 0.31             |
| <b>Clinical and procedure findings n (%)</b> |                         |                |                   |                  |
| LKW-Puncture (min) [IQR]                     | 329.5 [230.8-521.3]     | 289 [225-437]  | 362 [231-529]     | 0.43             |
| Baseline NIHSS score mean $\pm$ SD           | 18.3 $\pm$ 5            | 18.5 $\pm$ 5.1 | 18.1 $\pm$ 5      | 0.65             |
| Pre-procedure IV-tPA                         | 44 (37.3)               | 21 (35.6)      | 23 (39)           | 0.70             |
| ASPECTS [IQR]                                | 7 [6-7]                 | 7 [5-7]        | 6 [6-7]           | 0.87             |
| Site of occlusion:                           |                         |                |                   |                  |
| Internal carotid artery                      | 34 (28.8)               | 19 (32.2)      | 15 (25.4)         |                  |
| Middle cerebral artery-M1segment             | 84 (71.2)               | 40 (67.8)      | 44 (74.6)         | 0.42             |
| First-line technique:                        |                         |                |                   |                  |
| SR                                           | 79 (66.9)               | 46 (78)        | 33 (55.9)         |                  |
| CA                                           | 16 (13.6)               | 7 (11.9)       | 9 (15.3)          |                  |
| Combined SR & CA                             | 23 (19.5)               | 6 (10.2)       | 17 (28.8)         | <b>0.02</b>      |
| General anesthesia                           | 15 (12.7)               | 7 (11.9)       | 8 (13.6)          | 0.78             |
| Balloon guide catheter                       | 101 (85.6)              | 49 (83.1)      | 52 (88.1)         | 0.43             |
| Procedure duration (min) [IQR]               | 47.5 [33-70]            | 40 [32-53]     | 63 [40-83]        | <b>&lt;0.001</b> |
| LKW- reperfusion (min) [IQR]                 | 389.5 [281.8-579.5]     | 337 [270-526]  | 426 [297-603]     | 0.15             |
| <b>Outcome n (%)</b>                         |                         |                |                   |                  |
| sICH                                         | 6 (5.1)                 | 4 (6.8)        | 2 (3.4)           | 0.40             |
| 90-day mortality                             | 24 (20.3)               | 11 (18.6)      | 13 (22)           | 0.65             |
| 90-day mRS 0-2                               | 44 (37.3)               | 28 (47.5)      | 16 (27.1)         | <b>0.02</b>      |

Abbreviations: IQR; interquartile range, LKW; Last Known Well, ASPECTS; Alberta Stroke Program Early CT Score, NIHSS; National Institute of Health Stroke Scale, IV-tPA; intravenous tissue plasminogen activator, SR; Stent-Retriever, CA; Contact Aspiration, sICH; symptomatic intracranial hemorrhage, mRS; modified Rankin Scale

**Supplemental Table V. Demographics, clinical and procedure characteristics (matched groups with HIR  $\geq 0.3$ )**

|                                                                                   | All Patients<br>(n=170)              | FPR<br>(n=85)                    | non-FPR<br>(n=85)                   | p value      |
|-----------------------------------------------------------------------------------|--------------------------------------|----------------------------------|-------------------------------------|--------------|
| <b>Demographics&amp; risk factors n (%)</b>                                       |                                      |                                  |                                     |              |
| Age (years) mean $\pm$ SD                                                         | 65.5 [52.8-77]                       | 68 [54-78.5]                     | 63 [52-75.5]                        | 0.27         |
| Female                                                                            | 79 (46.5)                            | 43 (50.6)                        | 36 (42.4)                           | 0.28         |
| Current smokers                                                                   | 25 (14.7)                            | 13 (15.3)                        | 12 (14.1)                           | 0.83         |
| Hypertension                                                                      | 119 (70)                             | 59 (69.4)                        | 60 (70.6)                           | 0.87         |
| Diabetes mellitus                                                                 | 16 (26.7)                            | 8 (23.5)                         | 8 (38.1)                            | 0.36         |
| Hyperlipidemia                                                                    | 43 (25.3)                            | 21 (24.7)                        | 22 (25.9)                           | 0.86         |
| Atrial fibrillation                                                               | 61 (35.9)                            | 29 (34.1)                        | 32 (37.6)                           | 0.63         |
| <b>Clinical and procedure findings n (%)</b>                                      |                                      |                                  |                                     |              |
| LKW-Puncture (min) [IQR]                                                          | 300.5 [213.3-529.3]                  | 297 [217-530]                    | 304 [208.5-527]                     | 0.96         |
| Baseline NIHSS score mean $\pm$ SD                                                | 17.5 $\pm$ 5.5                       | 17.9 $\pm$ 5.4                   | 17.2 $\pm$ 5.6                      | 0.46         |
| Pre-procedure IV-tPA                                                              | 66 (38.8)                            | 36 (42.4)                        | 30 (35.3)                           | 0.35         |
| ASPECTS [IQR]                                                                     | 8 [7-9]                              | 8 [7-9.5]                        | 8 [7-9]                             | 0.70         |
| rCBF<30%                                                                          | 10.2 [3-24.6]                        | 7 [2.6-22.3]                     | 11.6 [3-26.4]                       | 0.32         |
| Site of occlusion:<br>Internal carotid artery<br>Middle cerebral artery-M1segment | 42 (24.7)<br>128 (75.3)              | 23 (27.1)<br>62 (72.9)           | 19 (22.4)<br>66 (77.6)              | 0.48         |
| First order technique:<br>SR<br>CA<br>Combined SR & CA                            | 127 (74.7)<br>19 (11.2)<br>24 (14.1) | 70 (82.4)<br>9 (10.6)<br>6 (7.1) | 57 (67.1)<br>10 (11.8)<br>18 (21.2) | <b>0.03</b>  |
| General anesthesia                                                                | 12 (7.1)                             | 6 (7.1)                          | 6 (7.1)                             | 1.00         |
| Balloon guide catheter                                                            | 158 (92.9)                           | 77 (90.6)                        | 81 (95.3)                           | 0.23         |
| Procedure duration (min) [IQR]                                                    | 45 [31-69]                           | 34 [26-47.5]                     | 63 [41.5-87]                        | <b>0.001</b> |
| LKW-Reperfusion(mTICI2c-3)(min) [IQR]                                             | 367 [269.3-606]                      | 347 [252.5-586]                  | 379 [291.5-619]                     | 0.35         |
| <b>Outcome n (%)</b>                                                              |                                      |                                  |                                     |              |
| sICH                                                                              | 7 (4.1)                              | 5 (5.9)                          | 2 (2.4)                             | 0.44         |
| 90-day mortality                                                                  | 32 (18.8)                            | 11 (12.9)                        | 21 (24.7)                           | 0.05         |
| 90-day mRS (0-2)                                                                  | 87 (51.2)                            | 51 (60)                          | 36 (42.4)                           | <b>0.02</b>  |

Abbreviations: IQR; interquartile range, LKW; Last Known Well, NIHSS; National Institute of Health Stroke Scale, IV-tPA; intravenous tissue plasminogen activator, ASPECTS; Alberta Stroke Program Early CT Score, rCBF; regional cerebral blood flow, SR; Stent Retriever, CA; Contact Aspiration, sICH; symptomatic intracranial hemorrhage, mRS; modified Rankin Scale

**Supplemental Table VI. Demographics, clinical and procedure characteristics (matched groups with HIR <0.3)**

|                                                                                   | All Patients<br>(n=68)           | FPR<br>(n=34)                   | non-FPR<br>(n=34)                | p value      |
|-----------------------------------------------------------------------------------|----------------------------------|---------------------------------|----------------------------------|--------------|
| <b>Demographics&amp; risk factors n (%)</b>                                       |                                  |                                 |                                  |              |
| Age (years) mean ± SD                                                             | 65.1±17.9                        | 65.6±17.8                       | 64.6±18.3                        | 0.82         |
| Female                                                                            | 50 (73.5)                        | 25 (73.5)                       | 25 (73.5)                        | 1.00         |
| Current smokers                                                                   | 5 (7.4)                          | 4 (11.8)                        | 1 (2.9)                          | 0.16         |
| Hypertension                                                                      | 50 (73.5)                        | 24 (70.6)                       | 26 (76.5)                        | 0.58         |
| Diabetes mellitus                                                                 | 14 (20.6)                        | 7 (20.6)                        | 7 (20.6)                         | 1.00         |
| Hyperlipidemia                                                                    | 16 (23.5)                        | 5 (14.7)                        | 11 (32.4)                        | 0.09         |
| Atrial fibrillation                                                               | 20 (29.4)                        | 9 (26.5)                        | 11 (32.4)                        | 0.60         |
| <b>Clinical and procedure findings n (%)</b>                                      |                                  |                                 |                                  |              |
| LKW-Puncture (min) [IQR]                                                          | 396.5 [258.8-726.5]              | 432 [321-621]                   | 338 [201.3-737.8]                | 0.24         |
| Baseline NIHSS score mean ± SD                                                    | 16.7±5.4                         | 16.7±5.8                        | 16.7 ±5.2                        | 0.98         |
| Pre-procedure IV-tPA                                                              | 28 (41.2)                        | 14 (41.2)                       | 14 (41.2)                        | 1.00         |
| ASPECTS [IQR]                                                                     | 9 [7-10]                         | 9 [7.8-10]                      | 8 [7-9]                          | 0.20         |
| rCBF<30%                                                                          | 1 [0-2.5]                        | 1 [0-2.2]                       | 1 [0-3]                          | 0.78         |
| Site of occlusion:<br>Internal carotid artery<br>Middle cerebral artery-M1segment | 18 (26.5)<br>50 (73.5)           | 8 (23.5)<br>26 (76.5)           | 10 (29.4)<br>24 (70.6)           | 0.58         |
| First order technique:<br>SR<br>CA<br>Combined SR & CA                            | 57 (83.8)<br>3 (4.4)<br>8 (11.8) | 31 (91.2)<br>1 (2.9)<br>2 (5.9) | 26 (76.5)<br>2 (5.9)<br>6 (17.6) | 0.35         |
| General anesthesia                                                                | 5 (7.4)                          | 3 (8.8)                         | 2 (5.9)                          | 1.00         |
| Balloon guide catheter                                                            | 63 (92.6)                        | 32 (94.1)                       | 31 (91.2)                        | 0.64         |
| Procedure duration (min) [IQR]                                                    | 48.5 [32.3-63.8]                 | 38.5 [27-58.3]                  | 54.5 [44-77]                     | <b>0.001</b> |
| LKW-Reperfusion(mTICI2c-3) (min) [IQR]                                            | 453.5 [303.3-774.5]              | 477.5 [355.5-689]               | 435 [258.8-813.5]                | 0.39         |
| <b>Outcome n (%)</b>                                                              |                                  |                                 |                                  |              |
| sICH                                                                              | 6 (8.8)                          | 2 (5.9)                         | 4 (11.8)                         | 0.67         |
| 90-day mortality                                                                  | 4 (5.9)                          | 1 (2.9)                         | 3 (8.8)                          | 0.61         |
| 90-day mRS (0-2)                                                                  | 40 (58.8)                        | 22 (64.7)                       | 18 (52.9)                        | 0.32         |

Abbreviations: IQR; interquartile range, LKW; Last Known Well, NIHSS; National Institute of Health Stroke Scale, IV-tPA; intravenous tissue plasminogen activator, ASPECTS; Alberta Stroke Program Early CT Score, rCBF; regional cerebral blood flow, SR; Stent Retriever, CA; Contact Aspiration, sICH; symptomatic intracranial hemorrhage, mRS; modified Rankin Scale

**Supplemental Table VII. Multivariable regression analyses for good outcome (90-day mRS 0-2) in matched groups**

|                                  | Odds ratio | 95% CI         | p value          |
|----------------------------------|------------|----------------|------------------|
| <b>Group with ASPECTS &gt; 7</b> |            |                |                  |
| Age                              | 0.957      | 0.935 - 0.980  | <b>&lt;0.001</b> |
| Pre-procedure IV-tPA             | 3.066      | 1.507 – 6.240  | <b>0.002</b>     |
| Baseline NIHSS score             | 0.937      | 0.882 - 0.996  | <b>0.037</b>     |
| Diabetes mellitus                | 0.478      | 0.234 - 0.979  | <b>0.04</b>      |
| Hypertension                     | 0.540      | 0.251 - 1.161  | 0.12             |
| First pass reperfusion           | 1.382      | 0.730 - 2.617  | 0.32             |
| LKW-Reperfusion                  | 1.00       | 0.999-1.002    | 0.27             |
| <b>Group with ASPECTS ≤ 7</b>    |            |                |                  |
| First pass reperfusion           | 3.858      | 1.218 – 6.707  | <b>0.016</b>     |
| Current smoker                   | 5.065      | 1.318 - 19.465 | <b>0.018</b>     |
| LKW-Reperfusion                  | 0.998      | 0.997 – 1.00   | 0.07             |
| Diabetes mellitus                | 0.386      | 0.130 - 1.144  | 0.09             |
| Hypertension                     | 0.619      | 0.241 - 1.591  | 0.32             |
| <b>Group with HIR ≥ 0.3</b>      |            |                |                  |
| Baseline NIHSS score             | 0.917      | 0.861 - 0.977  | <b>0.007</b>     |
| First pass reperfusion           | 2.218      | 1.149 - 4.284  | <b>0.018</b>     |
| Hypertension                     | 0.523      | 0.247 - 1.104  | <b>0.09</b>      |
| Pre-procedure IV-tPA             | 1.527      | 0.748 - 3.120  | 0.25             |
| Diabetes mellitus                | 0.694      | 0.322 - 1.498  | 0.35             |
| LKW-Reperfusion                  | 0.999      | 0.998 – 1.00   | 0.20             |
| <b>Group with HIR &lt; 0.3</b>   |            |                |                  |
| Site of occlusion (ICA)          | 0.358      | 0.106 - 1.076  | 0.07             |
| First pass reperfusion           | 1.692      | 0.598 - 4.788  | 0.32             |
| General anesthesia               | 0.172      | 0.017 - 1.724  | 0.13             |
| LKW-Reperfusion                  | 0.999      | 0.998 - 1.001  | 0.32             |
